# Supplementary material
Source: PubMed Central journal article supplement (PMC3182346)
Supplement: mt2011109x9.pdf [file mt2011109x9.pdf]

**Table S2**

| siRNA           | $T_{m \text{ Exp}}$<br>(°C) | $T_{m \text{ nn}}$<br>(°C) | $\Delta H$<br>(kcal/mol) | $\Delta S$<br>(kcal/mol) | $\Delta G_{37^\circ\text{C}}$<br>(kcal/mol) |
|-----------------|-----------------------------|----------------------------|--------------------------|--------------------------|---------------------------------------------|
| siSurvivin      | 59.61                       | 71.1                       | -171.2                   | -468.5                   | -25.9                                       |
| siSurvivin-2'A' | 62.12                       | 70.5                       | -169                     | -463                     | -25.4                                       |
| siSurvivin-2'C' | 61.45                       | 71.2                       | -166.7                   | -455.3                   | -25.5                                       |
| siSurvivin-3    | 55.94                       | 62.6                       | -171.2                   | -481.1                   | -22.0                                       |
| siSurvivin-4    | 56.44                       | 62.6                       | -171.2                   | -481.1                   | -22.0                                       |
| siSurvivin-5    | 56.28                       | 62.6                       | 171.2                    | -481.1                   | -22.0                                       |
| siSurvivin-16   | 56.28                       | 62.6                       | -171.2                   | -481.1                   | -22.0                                       |
| siSurvivin-17   | 55.27                       | 65.4                       | -155.8                   | -431.4                   | -22.0                                       |
| siSurvivin-18   | 55.44                       | 70.7                       | -165                     | -451.1                   | -25.1                                       |
| siSurvivin-19   | 58.2                        | 72.1                       | -166.6                   | -453.7                   | -25.9                                       |
