# Supplementary material
Source: PubMed Central journal article supplement (PMC3182346)
Supplement: mt2011109x10.pdf [file mt2011109x10.pdf]

**Table S3**

| mRNA               | Forward Primer            | Reverse Primer               |
|--------------------|---------------------------|------------------------------|
| PIK3CB             | GGGAAGGAGGCCATGCAT        | CAACATAGAGTTCTGAGAGGATAACACA |
| MAPK-14            | CGAGCGTTACCAGAACCTGT      | CGTCCAACAGACCAATCACA         |
| MPHOSPH-1          | TTGAAGACATGCGAATGACAC     | TGAGCTTTCCAAGCACATCT         |
| Survivin           | GCACCACTTCCAGGGTTTAT      | CTCTGGTGCCACTTTCAAGA         |
| TNF- $\alpha$      | AACCTCCTCTCTGCCATCAA      | GGAAGACCCCTCCCAGATAG         |
| OAS-2              | TCAGAAGAGAAGCCAACGTG      | CGGAGACAGCGAGGGTAAAT         |
| IFN- $\beta$       | TGCTTCTCCACGACAGCTCT      | TGACACTGACAATTGCTGCT         |
| IFIT1              | GCCACAAAAAATCACAAGCC      | CCATTGTCTGGATTTAAGCG         |
| MAPK-14 GSP        | -                         | TCATCTGTGTGCCGAGCCAGTCCAA    |
| MAPK-14GSP nested  | -                         | TCTGCCCCCATGAGATGGGTCACCA    |
| 5' GeneRacer       | CGACTGGAGCACGAGGACACTGA   | -                            |
| 5'GeneRacer nested | GGCACTGACATGGACTGAAGGAGTA | -                            |
